# Supplementary material
Source: Springer Nature journal article supplement (https://www.springermedizin.de/resource/supplementary/12889_2012_5198_MOESM4_ESM.pdf/9494848)

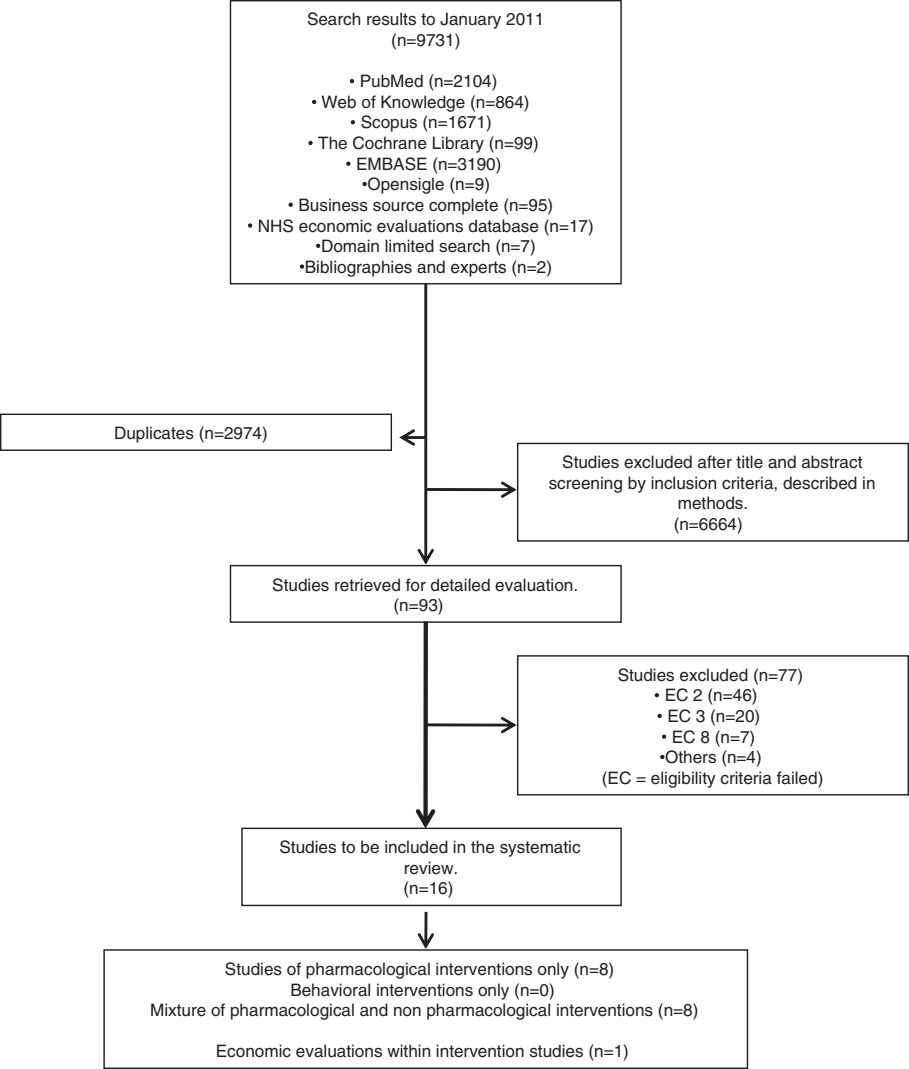

Supplement: MOESM4 [file 9494848]
